# Supplementary material for: A noise-optimized virtual monoenergetic reconstruction algorithm improves the diagnostic accuracy of late hepatic arterial phase dual-energy CT for the detection of hypervascular liver lesions
Source: Springer Nature journal article supplement (doi:10.1007/s00330-018-5313-6), 2018-02-19
Supplement: MOESM2 [file 15474296]

**Supplemental Table 1:** Inclusion and exclusion criteria.

| **Inclusior Criteria** |
| --- |
| Hepatocellular carcinoma in a cirrhotic liver |
| Surveillance of liver cirrhosis |
| Cancer staging or follow-up |
| Liver lesion characterization |
| **Exclusion Criteria** |
| Pregnancy |
| Previous allergic reactions to iodinated contrast media |
| Impaired renal function (glomerular filtration rate < 30mL/min/1.73m2) |

**Supplemental Table 2**: Image quality score determinants.

| **Score** | **Sharpness** | **Noise** | **Diagnostic Acceptability** | **Lesion Conspicuity** |
| --- | --- | --- | --- | --- |
| **1** | Unacceptable | Unacceptable | Unacceptable | Not dinstinct |
| **2** | Poorer than average | Above average | Sub-diagnostic | Barely distinct |
| **3** | Average | Average | Average | Moderately distinct |
| **4** | Better than average | Less than average | Above average | Fairly distinct |
| **5** | Sharpest | Minimum or no noise | Excellent | Definitely distinct |

|  | **Reader 1** | | | **Reader 2** | | |
| --- | --- | --- | --- | --- | --- | --- |
| **VMI+** | **VMI** | **M_0.6** | **VMI+** | **VMI** | **M_0.6** |
|  | **<1 cm (n = 36)** | | | | | |
| **TP** | 24 | 20 | 19 | 26 | 22 | 19 |
| **TN** | 17 | 17 | 17 | 16 | 16 | 16 |
| **FP** | 0 | 0 | 0 | 1 | 1 | 1 |
| **FN** | 12 | 16 | 17 | 10 | 14 | 17 |
| **Se (95% CI)** | 67% (49%-81%) | 56% (38%-72%) | 53% (35%-70%) | 72% (55%-86%) | 61% (43%-77%) | 53% (35%-70%) |
| **Sp (95% CI)** | 100% (80%-100%) | 100% (80%-100%) | 100% (80%-100%) | 94% (71%-100%) | 94% (71%-100%) | 94% (71%-100%) |
|  | **≥1 cm (n = 25)** | | | | | |
| **TP** | 22 | 21 | 21 | 24 | 24 | 23 |
| **TN** | 16 | 16 | 16 | 14 | 14 | 15 |
| **FP** | 0 | 0 | 0 | 2 | 2 | 1 |
| **FN** | 3 | 4 | 4 | 1 | 1 | 2 |
| **Se (95% CI)** | 88% (69%-97%) | 84% (64%-95%) | 84% (64%-95%) | 96% (80%-100%) | 96% (80%-100%) | 92% (74%-99%) |
| **Sp (95% CI)** | 100% (79%-100%) | 100% (79%-100%) | 100% (79%-100%) | 87% (62%-98%) | 87% (62%-98%) | 94% (70%-100%) |
|  | **Overall (n = 61)** | | | | | |
| **TP** | 46 | 41 | 40 | 50 | 46 | 42 |
| **TN** | 33 | 33 | 33 | 30 | 30 | 31 |
| **FP** | 0 | 0 | 0 | 3 | 3 | 2 |
| **FN** | 15 | 20 | 21 | 11 | 15 | 19 |
| **Se (95% CI)** | 75% (63%-85%) | 67% (54%-79%) | 66% (52%-77%) | 82% (70%-91%) | 75% (63%-85%) | 69% (56%-80%) |
| **Sp (95% CI)** | 100% (89%-100%) | 100% (89%-100%) | 100% (89%-100%) | 91% (76%-98%) | 91% (76%-98%) | 94% (80%-99%) |
|  | **Inter-reader agreement (κ)** | | | | | |
| **VMI+** | 0.89 | | | | | |
| **VMI** | 0.86 | | | | | |
| **M_0.6** | 0.83 | | | | | |

**Supplemental Table 3**: Diagnostic accuracy and inter-reader agreement of both readers for the identification of hypervascular liver lesions. TP= true positive, TN= true negative, FP= false positive, FN= false negative, Se= sensitivity, Sp= specificity, CI = confidence interval.
